# Supplementary material
Source: Springer Nature journal article supplement (https://www.springermedizin.de/resource/supplementary/12879_2012_2547_MOESM11_ESM.pdf/9444842)

## Local symptoms

## Systemic symptoms

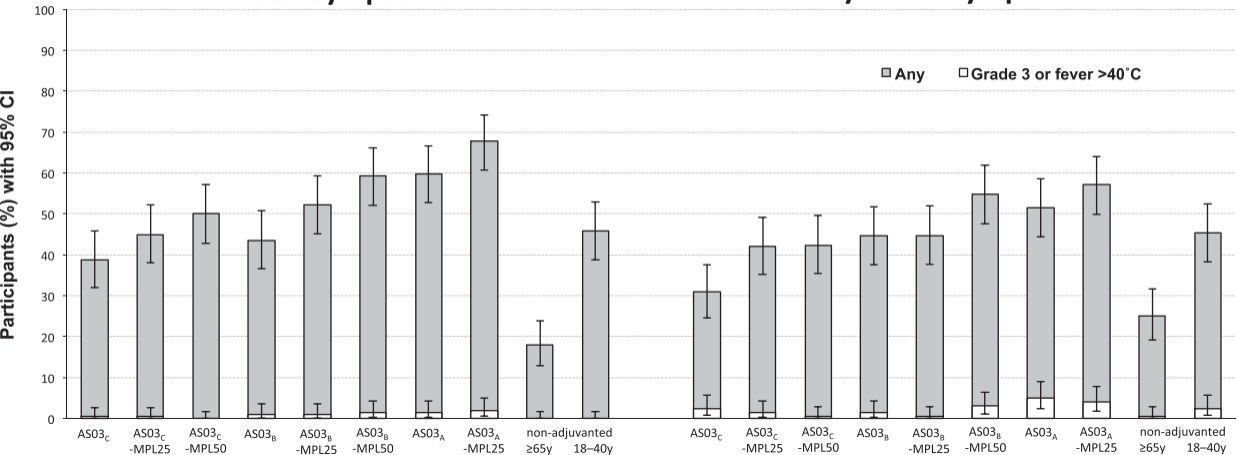

Supplement: MOESM11 [file 9444842]
